# Supplementary material for: Whole-Genome Resequencing of Wild and Cultivated Cannabis Reveals the Genetic Structure and Adaptive Selection of Important Traits
Source: Research Square preprint supplement (doi:10.21203/rs.3.rs-1135527/v1), 2021-12-09
Supplement: Supplementary file 1 [file 2107841239caae03d9a0e881.xls]

## Sheet: Table S4
Table S4 The SNPs number of homozygote and heterozygote of samples
Sample ID	Latitude	Homozygote	Heterozygote	Ratio of heterozygote
US	50.08	2342473	2271492	0.492308
FN	61.98	2455218	2765998	0.529761
W5	41.5	2273344	2594053	0.532945
C9	24.15	2107173	2485434	0.541182
W9	50.16	2069489	2463273	0.543438
C11	24.24	1961955	2444037	0.554708
W1	27.7	2060182	2767552	0.573261
W2	29.59	1989503	2785991	0.583393
C8	31.45	1989861	2829879	0.587143
W8	36.41	2082155	2966146	0.587553
W7	45.06	2095613	3066950	0.594075
C10	26.66	1870030	2805447	0.600034
C5	37.87	1949260	2939973	0.601316
C12	26.11	1786850	2698275	0.601605
W6	42.68	2061021	3125066	0.602586
C6	37.43	1925989	2969060	0.606543
C7	45.06	2036192	3139931	0.606618
C1	36.5	1938779	3015998	0.608705
C4	38.28	1879644	2968037	0.612259
W3	43.92	1914524	3039112	0.613511
W4	43.48	1898882	3023745	0.614254
PK	-	1840360	2946487	0.615538
C2	39.42	1859721	3029990	0.619666
C3	42.15	1876247	3085176	0.621833
CD	-	1365560	3050533	0.690776
HL	-	1095529	2616664	0.704884
The samples were sorted according to the heterozygosity.
