# Supplementary material for: Whole-Genome Resequencing of Wild and Cultivated Cannabis Reveals the Genetic Structure and Adaptive Selection of Important Traits
Source: Research Square preprint supplement (doi:10.21203/rs.3.rs-1135527/v1), 2021-12-09
Supplement: Supplementary file 2 [file 23a855004c67b43ea253868d.xls]

## Sheet: Table S5
Table S5 Positive selection genes identified by Fst and Δπ
Region	Mean_Fst	Δπ	Gene symbol
01:4285001-4295000	0.169809	3.1488	LOC115703691,LOC115703859,LOC115706723
01:4290001-4300000	NS	2.76927	LOC115703691,LOC115703859
01:34900001-34910000	NS	2.46946	LOC115706128
01:34905001-34915000	0.195382	NS	LOC115706128
01:34945001-34955000	NS	2.54423	LOC115704000
01:34950001-34960000	0.209565	3.20702	LOC115704000
01:34955001-34965000	0.188164	2.93802	LOC115704000
01:83505001-83515000	0.2201	4.40272	HAT22
01:83520001-83530000	0.219511	3.14386	HAT22
01:84830001-84840000	0.187999	2.43473	LOC115704467
02:10010001-10020000	0.167927	4.96588	LOC115718878
02:10015001-10025000	0.174908	6.07859	LOC115718878
02:10020001-10030000	NS	2.69307	LOC115718878
02:14635001-14645000	0.212087	NS	LOC115721190
02:14640001-14650000	0.283613	3.34462	LOC115721190
02:34510001-34520000	NS	3.01958	LOC115721282
02:34515001-34525000	NS	2.54463	LOC115721282
02:34520001-34530000	0.202645	2.69384	LOC115719561, LOC115721282, TRNAA-CGC-4
02:34525001-34535000	0.238902	2.52087	LOC115719561, LOC115721282, TRNAA-CGC-4, LOC115719562
02:36370001-36380000	0.179196	NS	LOC115718578, LOC115718579
02:36375001-36385000	0.226738	2.46033	LOC115718578, LOC115719733, LOC115718579
02:49875001-49885000	0.16994	2.58322	LOC115721305
02:49880001-49890000	NS	2.51761	LOC115721305
04:22100001-22110000	0.210539	11.391	LOC115714595
04:22105001-22115000	0.169137	3.85017	LOC115714595
04:22110001-22120000	NS	2.38647	LOC115714595
04:58245001-58255000	0.169991	2.69298	LOC115713531
04:81520001-81530000	0.171275	NS	LOC115712715
04:81525001-81535000	0.325981	2.8674	LOC115712715
04:81530001-81540000	0.308941	2.4095	LOC115712715
04:83160001-83170000	0.287406	NS	SUVR5
04:83165001-83175000	0.388478	3.25066	SUVR5
04:83170001-83180000	0.314925	NS	SUVR5
04:85275001-85285000	0.225912	NS	MORC2
04:85280001-85290000	0.18084	NS	MORC2
04:85285001-85295000	0.268044	2.67562	MORC2
04:85290001-85300000	0.335822	3.41639	MORC2
04:85295001-85305000	0.203824	NS	MORC2
05:11995001-12005000	0.261164	3.04518	LOC115716764
05:12000001-12010000	0.208518	2.46286	LOC115716764
05:47040001-47050000	0.228746	2.69355	LOC115717061
05:47045001-47055000	0.230336	2.49914	LOC115717802
05:47050001-47060000	0.179547	NS	LOC115717802
05:80740001-80750000	NS	2.71758	LOC115715817,LOC115718052
05:80745001-80755000	0.185029	5.08897	LOC115715817, LOC115715818, LOC115718052
05:80750001-80760000	0.165695	2.57072	LOC115715817, LOC115715818, LOC115718052
05:80775001-80785000	NS	2.55858	LOC115718053
05:80785001-80795000	0.203526	2.52086	LOC115718053, LOC115716887
05:80790001-80800000	0.192138	2.83333	LOC115715879, LOC115715880, LOC115716887
06:15270001-15280000	NS	2.448	LOC115695004
06:15275001-15285000	0.211294	3.93743	LOC115695004
06:15280001-15290000	0.184712	2.93408	LOC115695004
06:41900001-41910000	0.350317	4.23715	LOC115695193
06:41905001-41915000	0.393288	5.86035	LOC115695193
06:41915001-41925000	0.364956	4.80304	LOC115695193
06:41920001-41930000	0.381108	6.78524	LOC115695193
06:41925001-41935000	0.436429	10.6377	LOC115695193
06:41930001-41940000	0.47259	10.2382	LOC115695193
06:41935001-41945000	0.365015	4.11095	LOC115695193
06:41940001-41950000	0.355273	3.35409	LOC115695193
06:41990001-42000000	0.479041	6.59515	LOC115695196
06:41995001-42005000	0.487445	7.62674	LOC115695196
06:42075001-42085000	0.33064	NS	LOC115695197, LOC115725087
06:42080001-42090000	0.36836	8.36166	LOC115695197, LOC115725087
06:42085001-42095000	NS	2.40964	LOC115695197
07:5725001-5735000	NS	9.1724	LOC115696440
07:5730001-5740000	0.184974	17.0959	LOC115696440
07:5735001-5745000	NS	4.36616	LOC115696440
07:5740001-5750000	0.166812	9.7495	LOC115696440
07:5745001-5755000	0.184837	13.1916	LOC115696440
07:5750001-5760000	0.176789	12.6391	LOC115696440
07:5755001-5765000	NS	3.92151	LOC115696440
07:5760001-5770000	NS	5.61755	LOC115696440
07:5765001-5775000	0.183991	17.2407	LOC115696440
07:25425001-25435000	NS	2.38974	LOC115696452
07:25430001-25440000	0.163544	2.39475	LOC115696452
07:32410001-32420000	0.428542	6.70418	LOC115696502
07:32415001-32425000	0.352295	4.68014	LOC115696502
07:32420001-32430000	0.336391	2.67621	LOC115696502
07:32425001-32435000	0.315031	3.20146	LOC115696502
07:32430001-32440000	0.512975	NS	LOC115696502
07:32445001-32455000	0.234526	3.06614	LOC115697906
07:32450001-32460000	0.282646	3.79685	LOC115697906
07:32485001-32495000	0.330132	5.52912	LOC115696218
07:32490001-32500000	0.422348	4.14188	LOC115696218
07:32495001-32505000	0.272365	NS	LOC115696218
07:32590001-32600000	0.352724	2.92879	STOP1
07:32595001-32605000	0.503821	8.97084	STOP1, LOC115696505
08:50785001-50795000	0.174507	NS	LOC115699513
08:50790001-50800000	NS	2.60657	LOC115699513
08:50795001-50805000	0.180653	3.51462	LOC115699513
08:50805001-50815000	0.262384	6.68975	TZF4
08:50810001-50820000	0.195956	2.8413	TZF4
08:50855001-50865000	0.167979	2.42684	LOC115701368
09:24200001-24210000	0.313261	NS	LOC115723694
09:24205001-24215000	0.394582	34.2469	LOC115722529, LOC115723694
09:24210001-24220000	0.384588	8.0719	LOC115722529, LOC115723694
09:24300001-24310000	0.394474	6.18255	LOC115723697
09:24305001-24315000	0.294371	2.69724	PYG7, LOC115723697
09:24310001-24320000	0.318825	4.00225	PYG7, LOC115723195
09:24315001-24325000	0.401525	9.34716	PYG7, LOC115723195
09:24320001-24330000	0.220251	2.80812	PYG7
09:58035001-58045000	0.43803	8.53025	LOC115724143, LOC115724146
09:58040001-58050000	0.453696	9.34649	LOC115724143, LOC115724145
09:58045001-58055000	0.406913	6.99533	LOC115724144, LOC115724145
09:58050001-58060000	0.433476	11.9083	LOC115724144, LOC115724145
09:58065001-58075000	0.234768	16.5926	LOC115723169
X:49225001-49235000	0.511722	23.2452	ARID5
X:49335001-49345000	NS	31.171	HMGR1
X:49340001-49350000	0.459479	25.285	HMGR1
X:49405001-49415000	0.549732	37.4321	LOC115711738
X:49410001-49420000	0.490409	NS	LOC115711738
X:49485001-49495000	NS	18.5757	LOC115711780
X:49490001-49500000	0.477065	45.1522	LOC115711780
X:49495001-49505000	0.519112	56.2355	LOC115711806
X:49500001-49510000	NS	18.5657	LOC115711806
X:56715001-56725000	0.499151	NS	PAPS4
X:56720001-56730000	NS	21.9537	PAPS4
X:56905001-56915000	NS	20.2289	KAT3, LOC115712703
X:56910001-56920000	0.45769	NS	KAT3, LOC115712703
X:58290001-58300000	0.48116	30.1675	LOC115722410
X:58295001-58305000	0.470551	35.3748	LOC115722410
X:58300001-58310000	0.463328	39.1754	LOC115722410
X:87475001-87485000	0.497209	36.9612	LOC115696486
X:88735001-88745000	NS	18.1575	LOC115697162
X:88740001-88750000	0.472454	38.2733	LOC115697162
X:88745001-88755000	NS	20.9165	LOC115697162
X:89675001-89685000	NS	17.5926	LOC115697372
X:89695001-89705000	0.494441	55.6725	LOC115697372
X:89700001-89710000	0.485104	53.1877	LOC115697372
X:89705001-89715000	NS	41.6294	LOC115697372
X:89710001-89720000	NS	30.3268	LOC115697372
X:89740001-89750000	0.475668	18.1969	LOC115695018, LOC115697395
X:89745001-89755000	0.456466	NS	LOC115697395
X:91155001-91165000	0.687979	72.7556	CTR1
X:91160001-91170000	0.577572	27.8372	CTR1
X:91290001-91300000	NS	60.1126	LOC115697752
X:91295001-91305000	0.486446	NS	LOC115697752
X:91300001-91310000	0.509536	32.6653	LOC115697752
X:91775001-91785000	0.500758	33.5008	CET1
X:91780001-91790000	0.466699	NS	CET1
X:94720001-94730000	NS	18.2343	LOC115698313
X:94725001-94735000	0.478264	53.1048	LOC115698313
NS, Not significant
