# Supplementary material for: Whole-Genome Resequencing of Wild and Cultivated Cannabis Reveals the Genetic Structure and Adaptive Selection of Important Traits
Source: Research Square preprint supplement (doi:10.21203/rs.3.rs-1135527/v1), 2021-12-09
Supplement: Supplementary file 3 [file 6be653d12aaf6075d2a2887a.xls]

## Sheet: Sheet1
Table S2 Sample information and sequencing reads
Sample ID	Reads after removing PCR duplication	Mappable reads	Mapping rate (%)	Coverage
W1	87169082	85272433	97.82	9.947
W2	81855380	80417149	98.24	9.341
W3	88127657	86621682	98.29	10.057
W4	81683452	80381866	98.41	9.321
W5	79820546	78424892	98.25	9.109
W6	87614206	86154580	98.33	9.998
W7	90759336	89296981	98.39	12.946
W8	95413562	93990964	98.51	13.61
W9	56422841	53985044	95.68	8.048
C1	104829657	102849958	98.11	14.953
C2	87412201	85843803	98.21	9.975
C3	84265921	82801477	98.26	9.616
C4	77265131	76163697	98.57	11.021
C5	117248258	115560256	98.56	16.725
C6	89980184	88369524	98.21	10.268
C7	101483134	99780623	98.32	11.581
C8	90421545	88843136	98.25	10.319
C9	82446843	81124603	98.4	9.409
C10	85702470	84272124	98.33	12.225
C11	66171611	64995569	98.22	9.439
C12	66484282	65348874	98.29	9.484
PK	1115116010	1052624152	94.4	127.253
CD	835497145	820576562	98.21	96.297
HL	90965358	88424483	97.21	10.4844
FN	226150078	218680564	96.7	25.8073
US	135436714	120574219	89.03	15.4555
